# Supplementary material
Source: ML conference proceedings conference paper supplement (https://www.ecva.net/papers/eccv_2020/papers_ECCV/html/123630035_ECCV_2020_paper.php)
Supplement: Supplementary file 2 [file 123630035-supp.zip]

Archive with 8 entries (8 files):
- factorization.mp4
- pose-blendshapes.mp4
- principal_components_shape_female.mp4
- shape-interpolation.mp4
- skeleton.mp4
- submat_camera_ready.pdf
- surface_area.mp4
- unisex-fit-smpl-female.mp4
